# Supplementary material for: Structural and Electronic Properties of Oxygen Deficient HfO2-x Thin Films: From Insulator to Metal
Source: Research Square preprint supplement (doi:10.21203/rs.3.rs-7092026/v1), 2025-07-22
Supplement: Supplementary file 1 [file 60fdfb1ce6e3c7a0609f14b9.docx]

# Supplementary Information: Structural and Electronic Properties of Oxygen Deficient HfO2-x Thin Films

Author(s) and Corresponding Author(s)*:

Kalle Goß1,2,*, Alexander Gutsche2,3, Valentina Bonino4, Fernanda Malato Praxedes5, Jaime Segura-Ruiz4, Gema Martínez-Criado4,5, and Regina Dittmann1,2,*

**Affiliations**

1Peter Grünberg Institute 7, Forschungszentrum Jülich GmbH, 52428 Jülich, Germany

2Jülich-Aachen Research, Alliance (JARA-FIT), 52428 Jülich, Germany

3Peter Grünberg Institute 10, Forschungszentrum Jülich GmbH, 52428 Jülich, Germany

4The European Synchrotron Radiation Facility, 71 Avenue des Martyrs, 38043 Grenoble, France

5Instituto de Ciencia de Materiales de Madrid (ICMM), Consejo Superior de Investigaciones Científicas (CSIC), 28049 Cantoblanco, Spain

*k.goss@fz-juelich.de

**r.dittmann@fz-juelich.de

# S1: Fits of the complete Sample Set: Hf 4f core level

Figure S1: Fits for all Hf 4f core levels, including for the single crystalline monoclinic (Oxide PLD) sample and the metallic sample.

The fits of the Hf 4f core level share one common peak model, with the parameters defined in Table S1. All fits of the thin films characterized within this work are shown in Figure S1. Fits are performed with the software Casa XPS [1], using a Shirley background. The peak shape “GL” is a product formula of a Gaussian and a Lorentzian peak shape.

Table S1: Parameters for the peak fits of the Hf 4f core level. The spin orbit splitting for all components is 1.66 eV with a doublet peak area ratio of 4:3.

| Component | Line Shape | FMHW Constr. | Binding Energy (eV) |
| --- | --- | --- | --- |
| A: Hf+4 7/2 | GL(40) | 1.2 to 1.6 eV | 18.15 |
| B: Hf+4 5/2 | GL(40) | FWHM (A) | 19.81 |
| C: Hf+3 7/2 | GL(40) | FWHM (A) | 17.1875 |
| D: Hf+3 5/2 | GL(40) | FWHM (A) | 18.8475 |
| E: Hf+2 7/2 | GL(40) | FWHM (A) | 16.225 |
| F: Hf+2 5/2 | GL(40) | FWHM (A) | 17.885 |
| G: Hf+1 7/2 | GL(40) | FWHM (A) | 15.2625 |
| H: Hf+1 5/2 | GL(40) | FWHM (A) | 16.9225 |
| I: Hf0 7/2 | LA(1.4,3,10) | 0.4 to 1 eV | 14.3 |
| J: Hf0 5/2 | LA(1.4,3,10) | 0.4 to 1 eV | 15.96 |

S2: Fits of the complete Sample Set: Valence Band Region

Figure S 2: Valence band scans and fits of all HfO2-x samples, *i*ncluding for single crystalline the monoclinic (Oxide PLD) sample and the metallic sample. It should be noted that for the 50 W sample, the valence band is dominated by the valence band of the SiO2 substrate, soi no fit is attempted.

The valence band region is also fitted in Casa XPS, but due to the generally low data quality in this region and overlap of multiple peaks, a more loosely defined peak model is applied. The higher binding energy components (Hf 5d and O 2p) are fitted with a symmetric peak shape, while the component close to the Fermi edge (Hf 5d + 6s) is fitted with an asymmetric peak shape. The 50 W sample is not fitted, as the signal is dominated by contributions from the SiO2 substrate due to the very low deposition rate.

# S3: Deposition Parameters

Table S2: Parameters for the RF magnetron sputter deposition of HfO2-x thin films.

| Stoichiometry | Process gas composition | Pressure (mbar) | Power (W) | Distance (mm) |
| --- | --- | --- | --- | --- |
| HfO2 | 99 Ar / 1 O2 | 0.05 | 50 | 135 |
| HfO1.99 | 99 Ar / 1 O2 | 0.05 | 70 | 135 |
| HfO1.89 | 99 Ar / 1 O2 | 0.05 | 110 | 135 |
| HfO1.91 | 99 Ar / 1 O2 | 0.05 | 130 | 135 |
| HfO1.5 | 99 Ar / 1 O2 | 0.05 | 150 | 135 |
| HfO1.11 | 99 Ar / 1 O2 | 0.05 | 175 | 135 |
| HfO0.97 | 99 Ar / 1 O2 | 0.05 | 200 | 135 |
| HfO0.8 | 99 Ar / 1 O2 | 0.05 | 225 | 135 |
| HfO0.62 | 99 Ar / 1 O2 | 0.05 | 250 | 135 |
| HfO0.23 | Ar | 0.01 | 30 | 35 |

Table S2 shows the deposition parameters for all samples that were deposited via RF magnetron sputtering. The metallic sample (nominally Hf0.23) is uniquely sputtered with no oxygen process gas and at a lower sample-target distance.

References

[1] Neal Fairley, http://www.casaxps.com, © Casa software Ltd. [Online]. Available: http://​www.casaxps.com​/​
